# Supplementary material for: Evaluation of Major Constituents of Medicinally Important Plants for Anti-Inflammatory, Antidiabetic and AGEs Inhibiting Properties: In Vitro and Simulatory Evidence
Source: MDPI journal article supplement (doi:10.3390/molecules27196715), 2022-10-09
Supplement: s1 [file s1]

## Supplementary data

Table S1. Ayurvedic medical plants and their major constituents

| Plant species                                     | Major components                                                                                          | References                           |
|---------------------------------------------------|-----------------------------------------------------------------------------------------------------------|--------------------------------------|
| <i>Juglans regia</i> L.                           | Juglone                                                                                                   | (Raafa, 2018)                        |
| <i>Syzygium aromaticum</i> (L.) Merr. & L.M.Perry | Eugenol, caryophyllene, $\alpha$ -humulene, caryophyllene oxide                                           | (Alma <i>et al.</i> , 2007)          |
| <i>Eruca sativa</i> Mill.                         | 2-Phenylethylisothiocyanate                                                                               | (Khoobchandani <i>et al.</i> , 2010) |
| <i>Myristica fragrans</i> Houtt                   | Caryophyllene oxide, palmitic acid , 2-Phenylethylisothiocyanate                                          | (Shafiq <i>et al.</i> , 2016)        |
| <i>Punica granatum</i> L.                         | Gallic acid, apigenin, quercetin, pelargonidin, cyanidin, punicalin, punicalagin, granatin A, granatin B. | (Singh <i>et al.</i> , 2018)         |
| <i>Azadirachta indica</i> A. Juss                 | Nimbidine, azadirachtin (azadirachtin A), salannol, salannin                                              | (Biswas <i>et al.</i> , 2002)        |

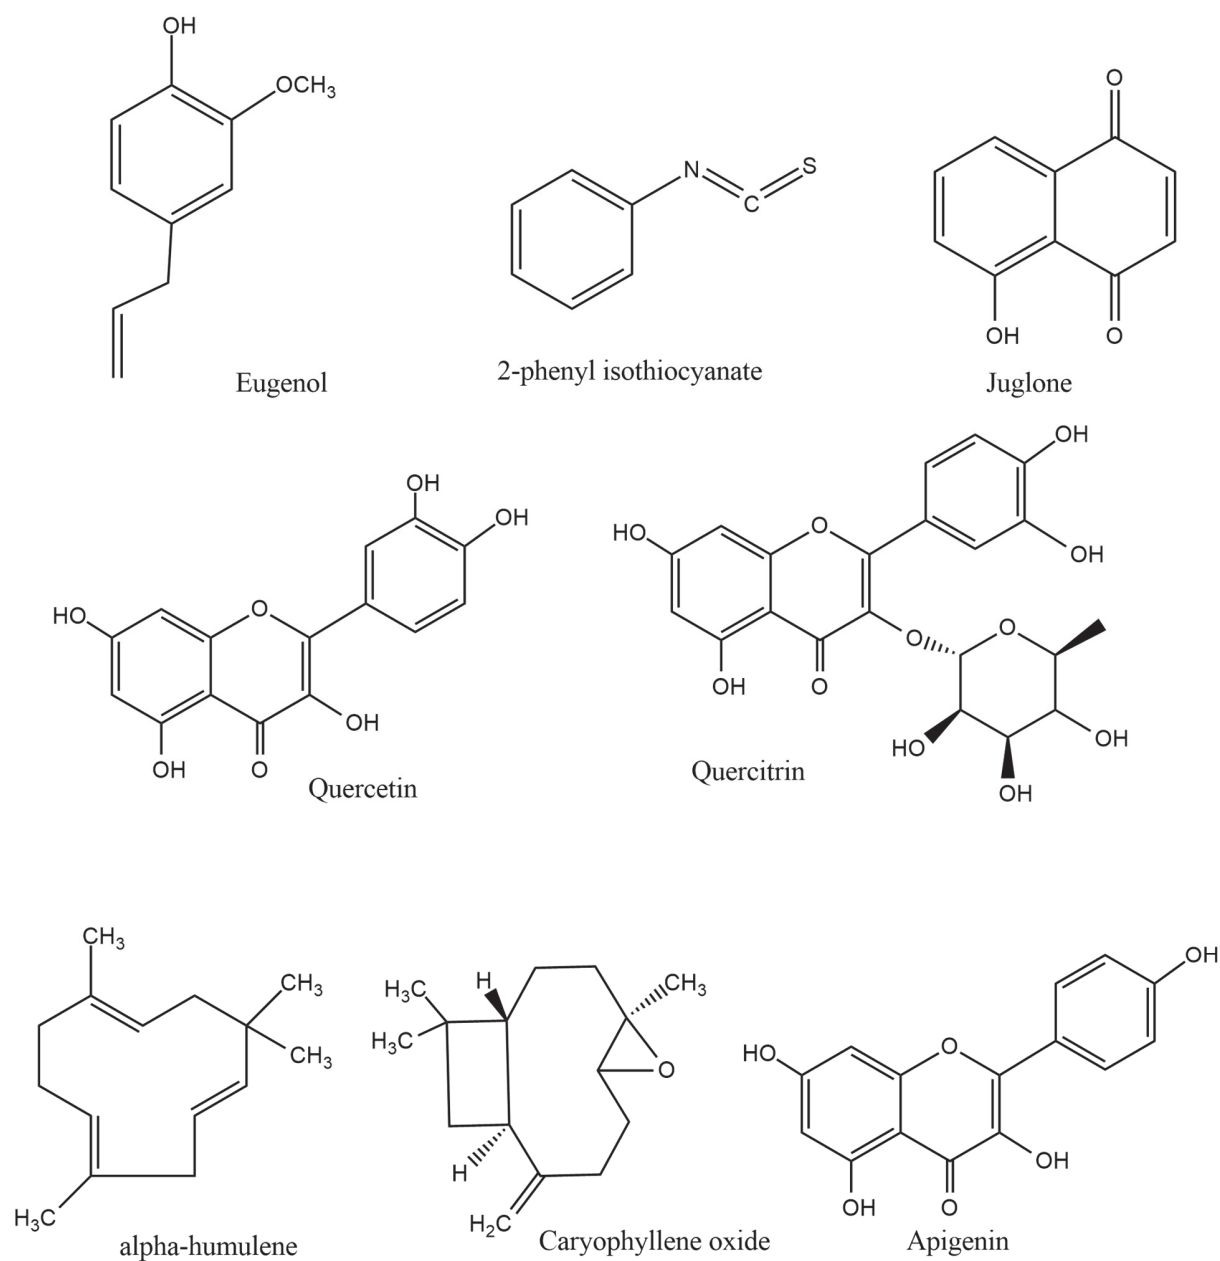

Figure S1. Structure of tested compounds including Eugenol(C<sub>10</sub>H<sub>11</sub>O<sub>2</sub>), 2-Phenyl isothiocyanate (C<sub>7</sub>H<sub>5</sub>NS), Juglone (C<sub>10</sub>H<sub>6</sub>O<sub>3</sub>), Quercetin(C<sub>15</sub>H<sub>10</sub>O<sub>7</sub>), Quercitrin (C<sub>21</sub>H<sub>20</sub>O<sub>11</sub>), Alpha humulene (C<sub>15</sub>H<sub>22</sub>), Caryophyllene oxide (C<sub>15</sub>H<sub>24</sub>O), Apigenin (C<sub>15</sub>H<sub>10</sub>O<sub>6</sub>).

1

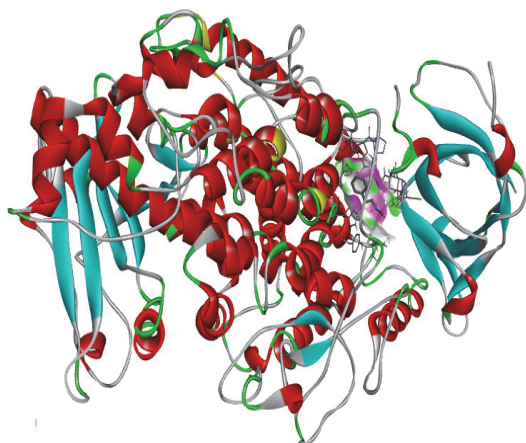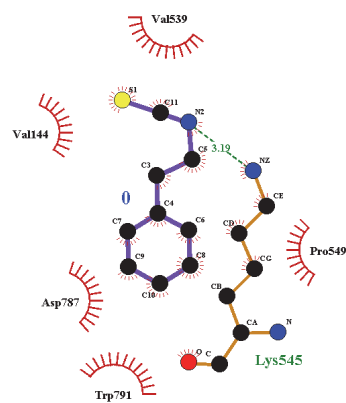

2

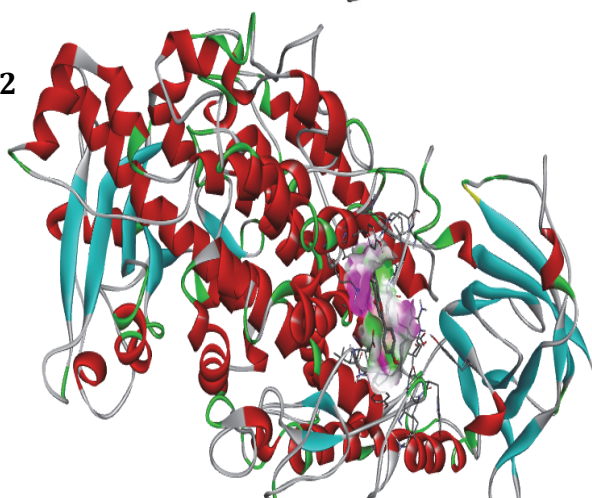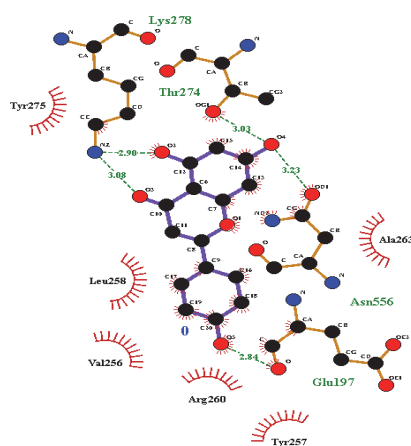

3

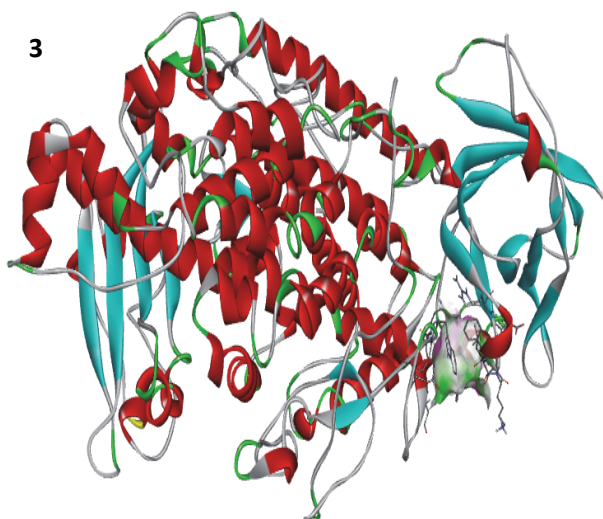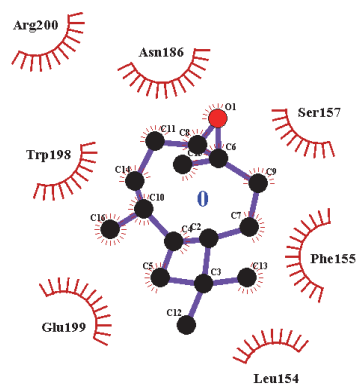

Figure S2. 3D H-bonding interactions of 2-phenyl isothiocyanate pose no. 1 [1], apigenin pose no. 5[2] caryophyllene oxide pose no. 1 [3] with binding sites of transcriptional regulator **1IK3**.

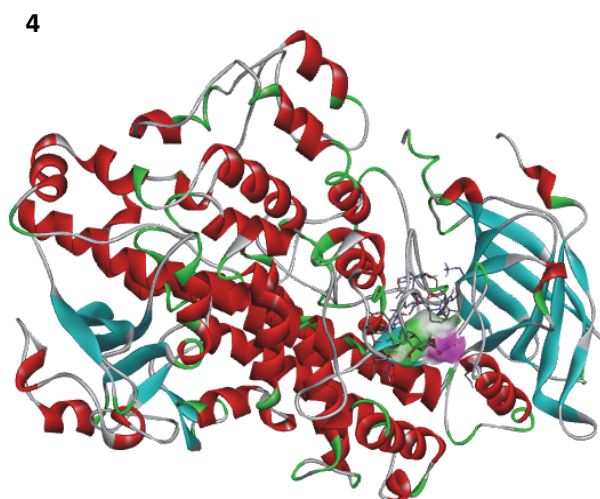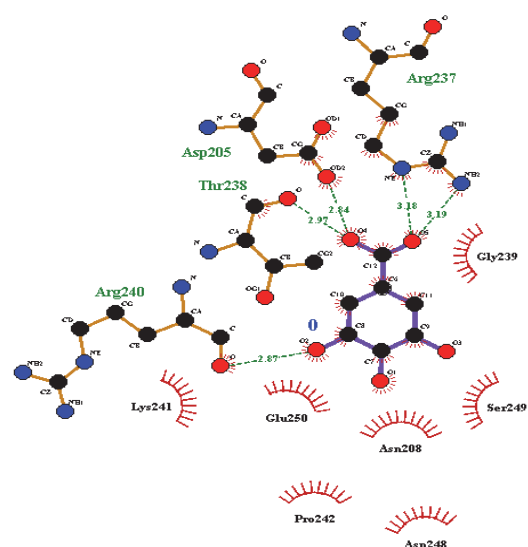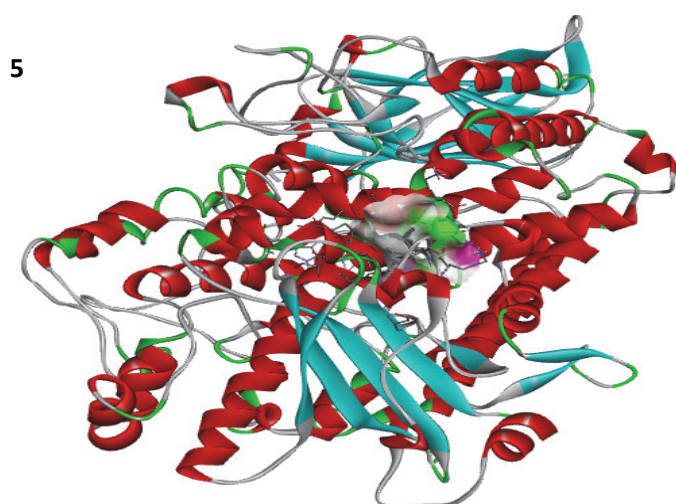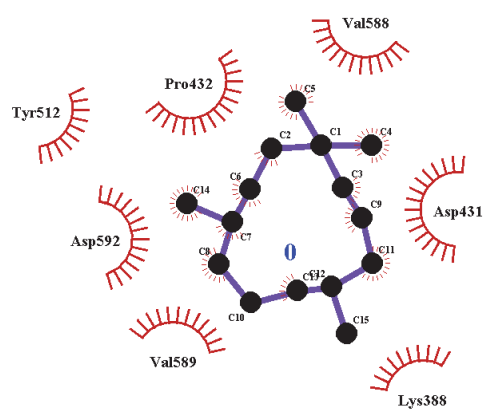

Figure S3. 3D H-bonding interactions of Eugenol pose rank 3 [4],  $\alpha$ -humulene pose no. 1 [5] with binding sites of transcriptional regulator **1IK3**

A 3D ribbon diagram of the 19S proteasome structure. The structure is composed of multiple subunits, with some colored in red, cyan, and grey. The red subunits form a large, complex structure, while the cyan subunits are interspersed within the structure. The grey subunits are also visible, particularly in the central region. The overall structure is highly complex and symmetrical.

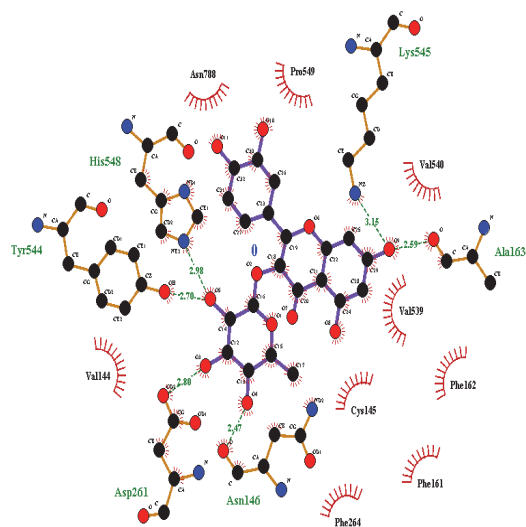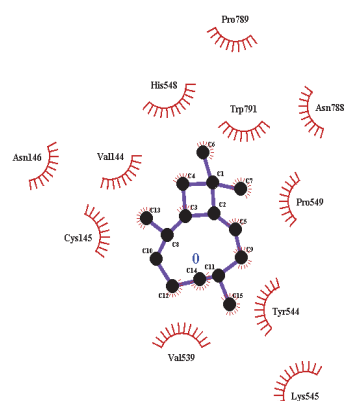

5

8

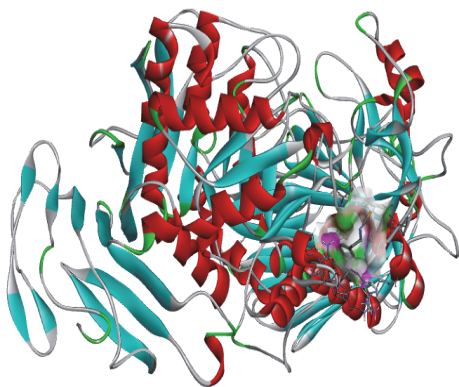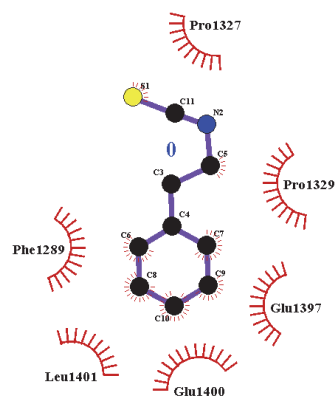

9

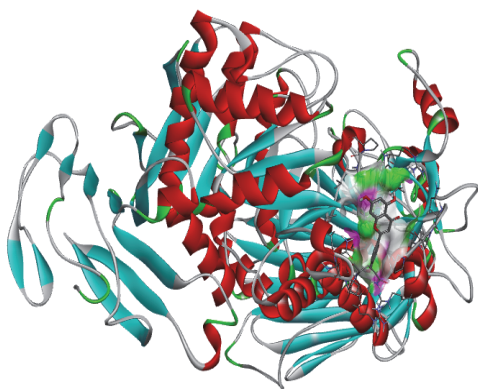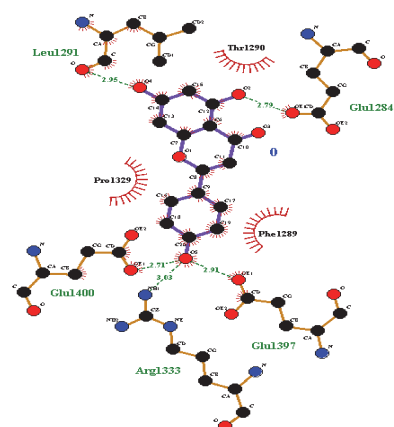

10

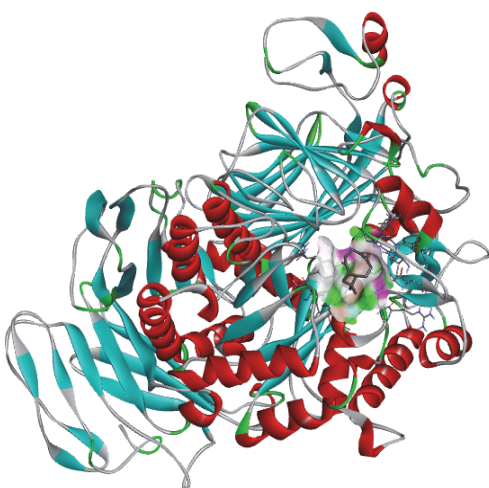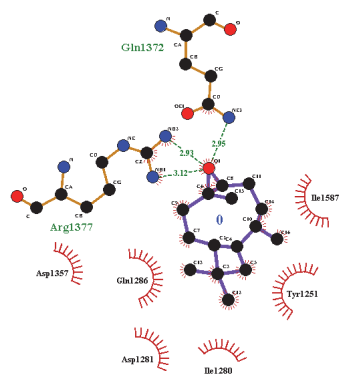



Figure S5. 3D H-bonding interactions of 2-phenylisothiocyanate pose no. 1 [8], apigenin pose no. 1 [9]; caryophyllene oxide pose no. 1 [10] with binding sites of transcriptional regulator 3TOP.

11

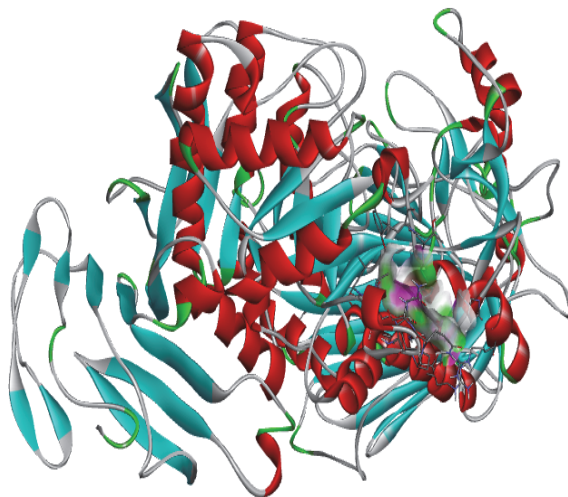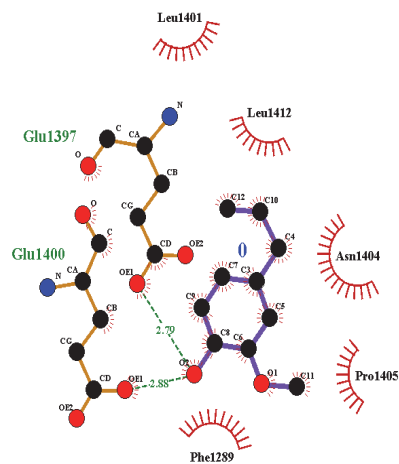

12

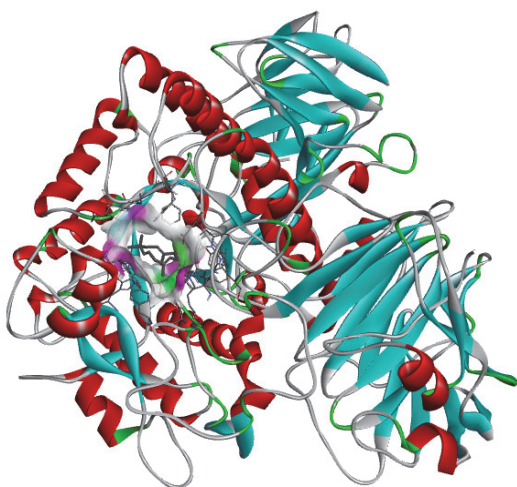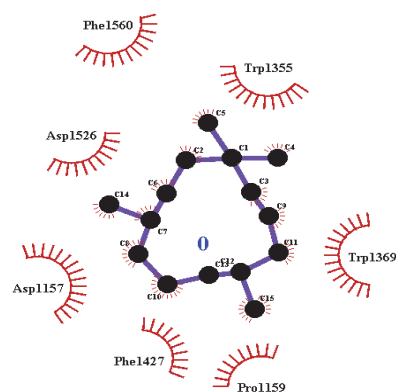

Figure S6. 3D H-bonding interactions of eugenol pose no. 2 [11] and  $\alpha$ -humulene pose no. 1 [12] with binding sites of transcriptional regulator 3TOP.

13

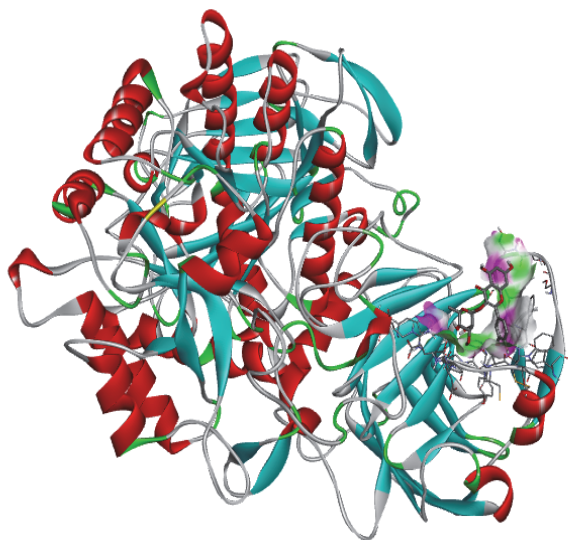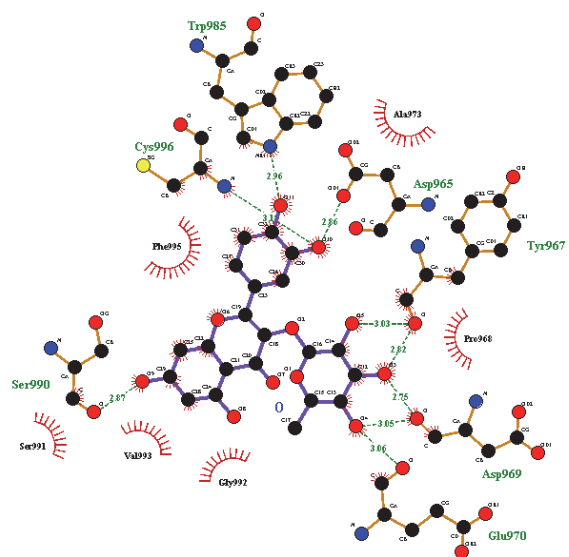

14

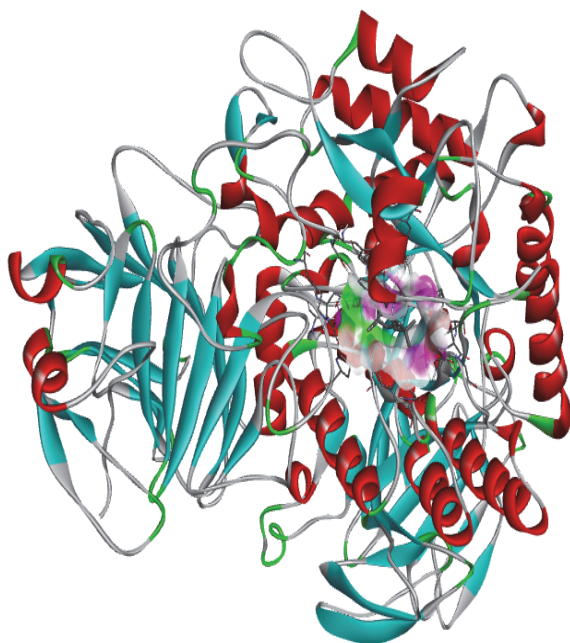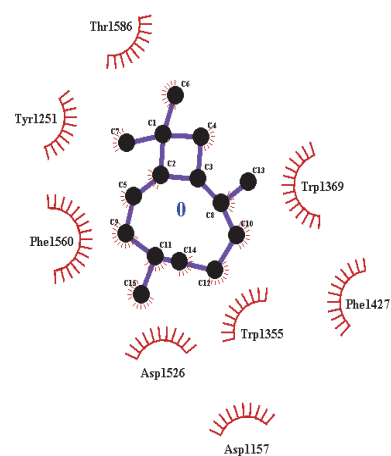

Figure S6. 3D H-bonding interactions of quercitrin pose no. 4 [13] and transcaryphyllene pose no. 1 [14] with binding sites of transcriptional regulator 3TOP.





18

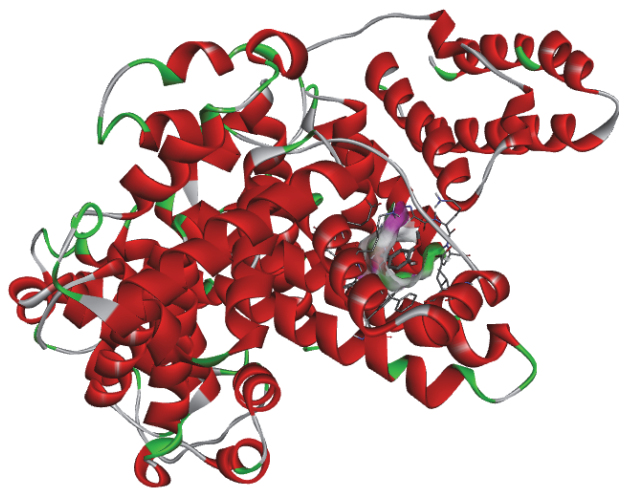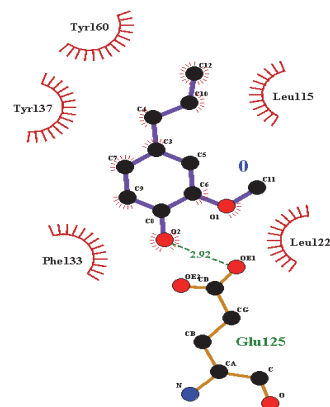

19

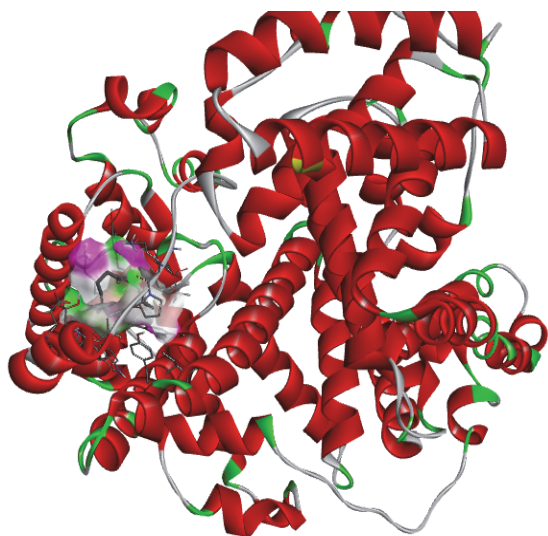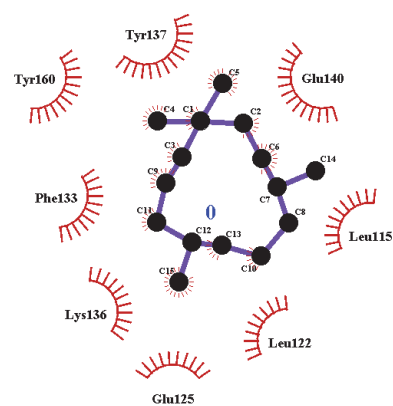

Figure S8. 3D H-bonding interactions of eugenol pose no. 1 [18],  $\alpha$ -humulene pose no. 1[19] with binding sites of transcriptional regulator **4F5S**.

20

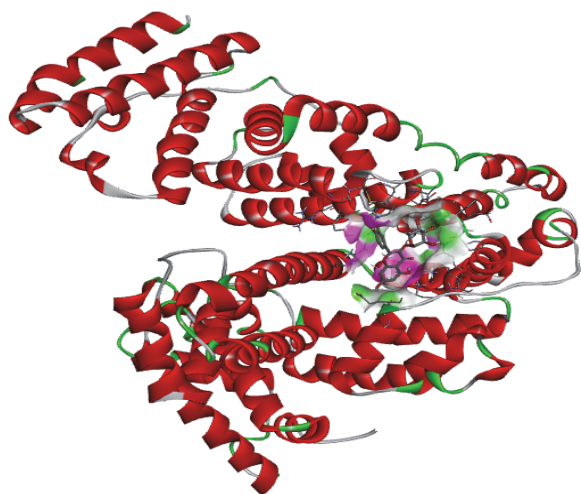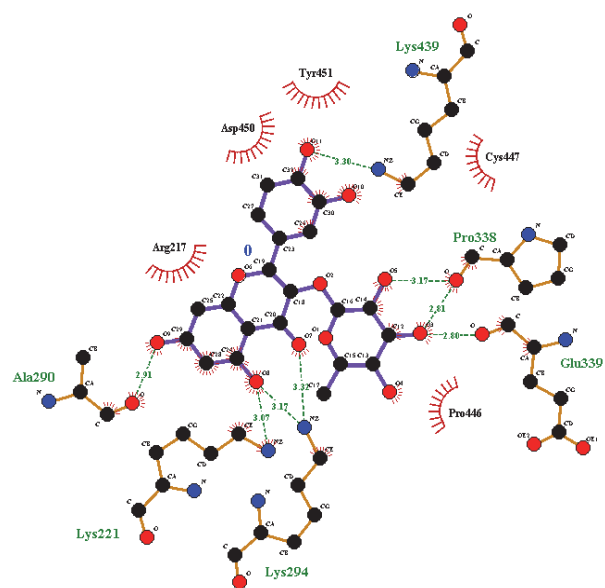

21

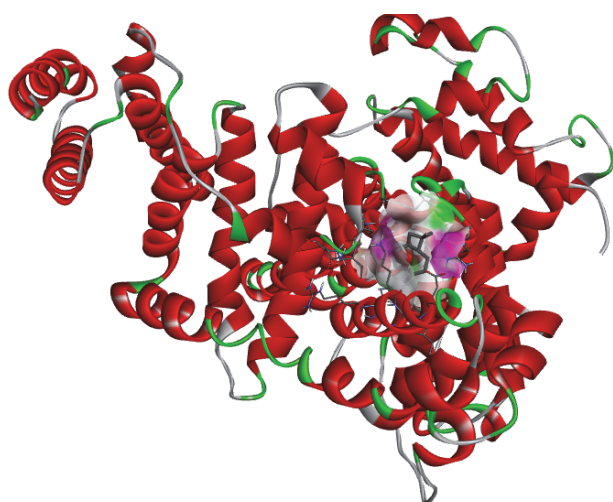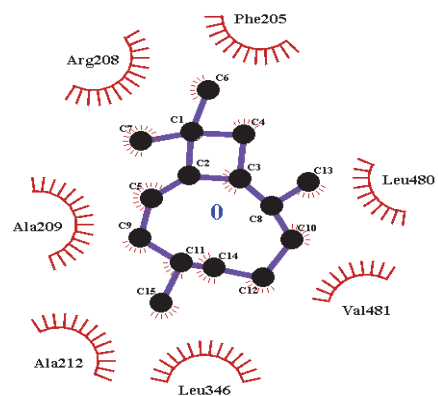

Figure S9. 3D H-bonding interactions of quercitrin pose no. 5 [20] and transcaryphyllene pose no. 1 [21] with binding sites of transcriptional regulator **4F5S**.
